# Supplementary material for: Thermal Comfort Index for Lactating Water Buffaloes under Hot and Humid Climate
Source: MDPI journal article supplement (doi:10.3390/ani11072067), 2021-07-11
Supplement: s1 [file s1]

Supplementary Table

Table S1

**Table S1 Formulation and chemical composition of Total Mix Ration fed to lactating buffaloes (% on air-dry basis)**

| Items                                       | Content % |
|---------------------------------------------|-----------|
| Grass ( <i>Pennisetum purpureum schum</i> ) | 12        |
| Brewer's grain                              | 21        |
| Cassava residue                             | 33        |
| Corn                                        | 17.83     |
| Wheat bran                                  | 7.51      |
| Soybean meal                                | 5.72      |
| Lime stone                                  | 0.5       |
| CaHPO <sub>4</sub>                          | 0.6       |
| NaHCO <sub>3</sub>                          | 0.8       |
| NaCl                                        | 0.7       |
| Vitamin-Mineral Premix <sup>1)</sup>        | 0.34      |
| Total                                       | 100       |
| Nutrient levels <sup>2)</sup>               |           |
| CP                                          | 14.6      |
| NDF                                         | 36.21     |
| ADF                                         | 23.5      |
| Ash                                         | 6.23      |

<sup>1</sup>The additive premix provided the following per Kg of diets: Vit. A 550 000IU, Vit. E 3000 IU, Vit. D3 150 000IU, Fe (as ferrous sulfate) 4.0g, Cu (as copper sulfate) 1.3g, Mn (as manganese sulfate) 3.0g, Zn (as zinc sulfate) 6.0g, Co (as cobalt sulfate) 80mg.

<sup>2</sup>Measured values
